# Supplementary material for: Transcriptome analysis of a rice cultivar reveals the differentially expressed genes in response to wild and mutant strains of Xanthomonas oryzae pv. oryzae
Source: PubMed Central journal article supplement (PMC6403221; doi:10.1038/s41598-019-39928-2), 2019-03-06
Supplement: 41598_2019_39928_MOESM2_ESM.pdf [file 41598_2019_39928_MOESM2_ESM.pdf]

**Transcriptome analysis of a rice cultivar reveals the differentially expressed genes in response to wild and mutant strains of *Xanthomonas oryzae* pv. *oryzae***

**Chunlian Wang<sup>1,+</sup>, Rezwan Tariq<sup>1,+</sup>, Zhiyuan Ji<sup>1,+</sup>, Zheng Wei<sup>1</sup>, Kaili Zheng<sup>1</sup>, Rukmini Mishra<sup>1</sup> and Kaijun Zhao<sup>1,\*</sup>**

<sup>1</sup>National Key Facility for Crop Gene Resources and Genetic Improvement (NFCRI), Institute of Crop Science, Chinese Academy of Agriculture Sciences (CAAS), Beijing 100081, China

\* Correspondence: zhaokaijun@caas.cn; Tel.: +86-10-8210-5852; Fax: 86-10-8210-8751

<sup>+</sup> These authors contributed equally to this work.

## **Supplementary files:**

**Supplementary Table 1.** Description of RNA-Seq paired end data produced by Illumina sequencing.

**Supplementary Table 2.** Detailed list of 1,235 DEGs at different time points in CBB23 genotype after infection of PXO99<sup>A</sup> and P99M2 strains. The significant DEGs were retrieved by Log<sub>2</sub>FC  $\geq 1$  (up-regulated genes) or  $\leq -1$  (down-regulated genes) as a threshold level. The gene ID, FPKM based expression pattern, and chromosomal position are mentioned in the table.

**Supplementary Table 3.** Description of differentially expressed TFs in CBB23 after infection of PXO99<sup>A</sup> and P99M2 strains at different time points.

**Supplementary Table 4.** Significantly enriched peroxidase responsive genes in CBB23 after PXO99<sup>A</sup> and P99M2 infection.

**Supplementary Table 5.** Summary of GO enrichment in CBB23 after PXO99<sup>A</sup> and P99M2 infection.

**Supplementary Table 6.** Significant GO terms (FDR  $\leq 0.05$ ) of DEGs after infection of PXO99<sup>A</sup> and P99M2 strains in CBB23 at different time periods.

**Supplementary Table 7.** Significant KEGG pathway ( $p$ -value  $\leq 0.05$ ) in CBB23 after PXO99<sup>A</sup> and P99M2 infection at different time points.

**Supplementary Table 8.** MapMan analysis of DEGs involved in host-pathogen interaction pathway in CBB23 genotype. The gene ID, bin code, gene description, and average Log<sub>2</sub>FC values are presented in the below-mentioned table.

**Supplementary Table 9.** Co-expression network analysis of nominated differentially expressed TFs with other rice genes.

**Supplementary Table 10.** List of qRT-PCR primers used for RNA-Seq data validation.
